# Supplementary material for: Inducing alignment of cyclic peptide nanotubes through the use of structured ionic liquids
Source: Royal Society of Chemistry journal article supplement (doi:10.1039/c3cc43837f), 2013-01-01
Supplement: c3cc43837f.pdf [file c3cc43837f.pdf]

## Supporting Information

### Inducing alignment of cyclic peptide nanotubes through the use of structured ionic liquids

Nolene Byrne,<sup>\*a</sup> Donna Menzies<sup>a</sup>, Nicolas Goujon<sup>a</sup>, and Maria Forsyth<sup>b</sup>

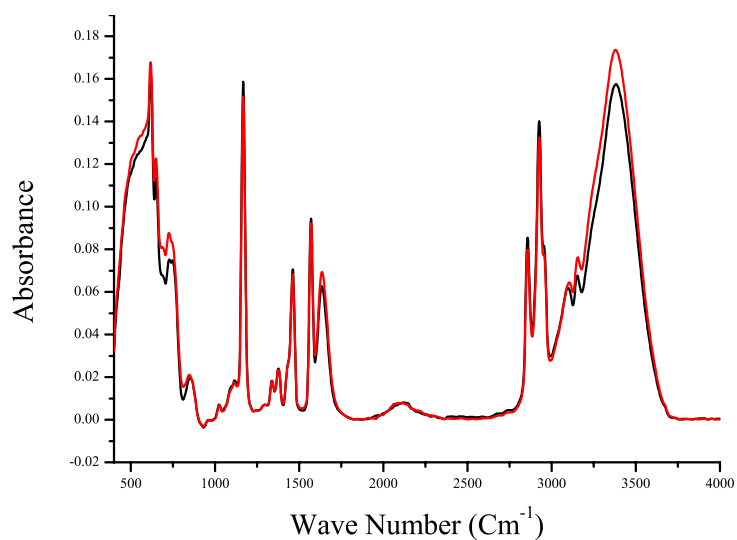

Figure S1: FTIR spectrum of OMImCl+15wt% H<sub>2</sub>O at room temperature (red line) and 35°C (black line)

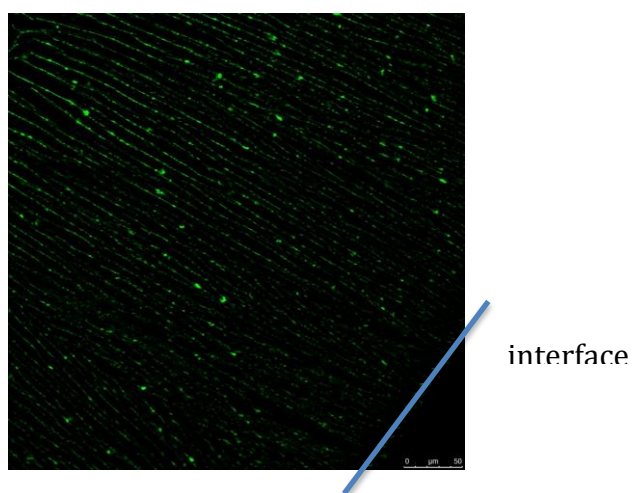

Figure S2: confocal image of OMImCl+15wt% H<sub>2</sub>O + cyclic peptide (4mg) showing alignment growing from the interface

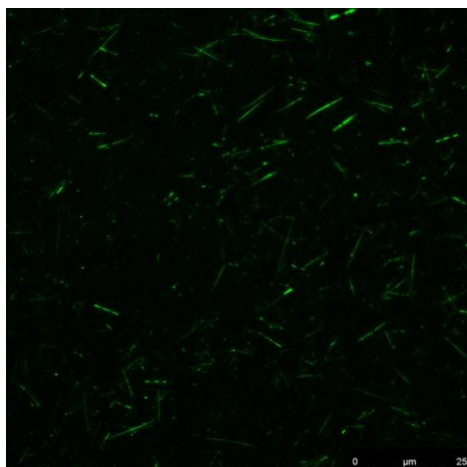

Figure S3: Confocal image of BMImCl 15wt% H<sub>2</sub>O + cyclic peptide (4mg), self assembly has occurred but no alignment is observed.
